# Supplementary material for: Simultaneous Quantification of Plasmodium Antigens and Host Factor C-Reactive Protein in Asymptomatic Individuals with Confirmed Malaria by Use of a Novel Multiplex Immunoassay
Source: PubMed Central journal article supplement (PMC6322473; doi:10.1128/jcm.00948-18), 2019-01-02
Supplement: e6a64e6f07e50b64fd386546d6aec09f_JCM.00948-18-s0001.pdf [file e6a64e6f07e50b64fd386546d6aec09f_JCM.00948-18-s0001.pdf]

## SUPPLEMENTAL MATERIAL

### *Table of contents:*

|                                                                                                                                            |      |
|--------------------------------------------------------------------------------------------------------------------------------------------|------|
| Table S1. <i>Plasmodium</i> antigen-specific monoclonal antibodies used in screening for the 4-Plex array development.....                 | S-2  |
| Table S2. Rapid antibody pairing to identify the high performing antibody pair in detecting HRP2....                                       | S-3  |
| Table S3. Rapid antibody pairing to identify the high performing antibody pair in detecting Pan LDH and <i>P. vivax</i> LDH.....           | S-4  |
| Table S4. Final monoclonal antibodies and calibrator proteins with their sources used on the 4-Plex array .....                            | S-5  |
| Table S5. Characterization of calibrator curves generated during assay validation.....                                                     | S-6  |
| Table S6. Dilutional linearity with the 4-Plex array.....                                                                                  | S-7  |
| Table S7. Descriptive statistics for amount of circulating antigen per parasite.....                                                       | S-9  |
| Fig S1. Parasitemia and concentration of HRP2 and Pan LDH in blood specimens from all subjects obtained during a course of IBSM study..... | S-10 |
| Fig S2. Distribution of CRP levels in malaria non-infected and infected groups.....                                                        | S-11 |

**Table S1.** *Plasmodium* antigen-specific monoclonal antibodies used in screening for the 4-Plex array development

| Biomarker           | Clone    | Host  | Property   | Ig class   | Supplier                       | Applications      |
|---------------------|----------|-------|------------|------------|--------------------------------|-------------------|
| HRP2                | MPFM-55A | Mouse | Monoclonal | IgM        | Immunology consultants lab     | ELISA, LF, WB     |
|                     | MPFG-55A | Mouse | Monoclonal | IgG        | Immunology consultants lab     | ELISA, LF, WB     |
|                     | PTL3     | Mouse | Monoclonal | IgM        | National Bioproducts Institute | ELISA, LF, WB     |
|                     | C1-13    | Mouse | Monoclonal | IgG        | National Bioproducts Institute | ELISA, LF, WB     |
|                     | 0445     | Mouse | Monoclonal | IgG        | Vista Diagnostics              | ELISA             |
|                     | 2G6      | Mouse | Monoclonal | IgG        | Vista Diagnostics              | ELISA             |
|                     | 4D6      | Mouse | Monoclonal | IgG        | Precision Antibody             | ELISA             |
|                     | 6C8      | Mouse | Monoclonal | IgG        | Precision Antibody             | ELISA             |
|                     | 8D3      | Mouse | Monoclonal | IgG        | Precision Antibody             | ELISA             |
|                     | 10C1     | Mouse | Monoclonal | IgG        | Precision Antibody             | ELISA             |
|                     | 10F5     | Mouse | Monoclonal | IgG        | Precision Antibody             | ELISA             |
|                     | 11E10    | Mouse | Monoclonal | IgG        | Precision Antibody             | ELISA             |
|                     | 12D4     | Mouse | Monoclonal | IgG        | Precision Antibody             | ELISA             |
|                     | 12F12    | Mouse | Monoclonal | IgG        | Precision Antibody             | ELISA             |
|                     | Pan LDH  | 1201  | Mouse      | Monoclonal | IgG                            | Vista Diagnostics |
| 19G7                |          | Mouse | Monoclonal | IgG        | Vista Diagnostics              | ELISA             |
| 1246                |          | Mouse | Monoclonal | IgG        | Vista Diagnostics              | ELISA             |
| 12G1                |          | Mouse | Monoclonal | IgG        | Vista Diagnostics              | ELISA             |
| 6G9                 |          | Mouse | Monoclonal | IgG        | Vista Diagnostics              | ELISA             |
| <i>P. vivax</i> LDH | 3H8      | Mouse | Monoclonal | IgG        | Vista Diagnostics              | ELISA             |
|                     | 1102     | Mouse | Monoclonal | IgG        | Vista Diagnostics              | ELISA             |
|                     | 13H4     | Mouse | Monoclonal | IgG        | Vista Diagnostics              | ELISA             |

Abbreviation: ELISA, enzyme-linked immunosorbent assay; LF, lateral flow; WB, western blot

**Table S2.** Rapid antibody pairing to identify the high performing antibody pair in detecting HRP2

|                      |          | Signal-to-noise ratio of 10 pg/mL to blank; HRP2 |      |       |      |      |     |      |     |      |      |       |      |       |  |
|----------------------|----------|--------------------------------------------------|------|-------|------|------|-----|------|-----|------|------|-------|------|-------|--|
| Detection<br>Capture | MPFM-55A | MPFG-55A                                         | PTL3 | C1-13 | 0445 | 2G6  | 4D6 | 6C8  | 8D3 | 10C1 | 10F5 | 11E10 | 12D4 | 12F12 |  |
| MPFM-55A             | 1.4      | 15.3                                             | 1.3  | 6.3   | 3.1  | 5.1  | 2.5 | 16.9 | 4.2 | 4.9  | 25.6 | 40.4  | 26.5 | 5.6   |  |
| MPFG-55A             | 4.3      | 5.5                                              | 1.9  | 5.8   | 2.8  | 8.5  | 1.4 | 8.3  | 1.5 | 4.6  | 16.5 | 22.4  | 8.7  | 4.7   |  |
| PTL3                 | 1.7      | 10.8                                             | 1.2  | 5.9   | 3.6  | 3.7  | 2.6 | 12.4 | 2.0 | 2.4  | 21.3 | 24.9  | 16.2 | 8.4   |  |
| C1-13                | 3.9      | 7.2                                              | 1.5  | 4.9   | 2.3  | 4.5  | 2.0 | 5.1  | 1.1 | 2.9  | 13.2 | 14.0  | 5.7  | 5.6   |  |
| 445                  | 5.0      | 5.7                                              | 1.4  | 5.4   | 3.1  | 14.5 | 3.1 | 9.5  | 1.3 | 4.0  | 20.2 | 31.5  | 13.3 | 5.9   |  |
| 2G6                  | 2.4      | 12.7                                             | 1.0  | 2.9   | 3.0  | 8.2  | 1.5 | 18.7 | 4.0 | 2.1  | 41.7 | 55.3  | 10.4 | 8.2   |  |
| 4D6                  | 2.5      | 2.5                                              | 1.0  | 3.2   | 2.0  | 8.0  | 1.0 | 6.0  | 2.1 | 1.0  | 9.9  | 20.6  | 1.2  | 1.9   |  |
| 6C8                  | 1.0      | 1.3                                              | 0.9  | 1.1   | 1.3  | 3.4  | 0.9 | 1.5  | 1.2 | 1.0  | 1.5  | 4.2   | 1.0  | 0.9   |  |
| 8D3                  | 3.9      | 6.0                                              | 1.3  | 5.0   | 2.4  | 14.2 | 2.2 | 7.2  | 1.1 | 2.5  | 18.3 | 25.3  | 3.7  | 4.4   |  |
| 10C1                 | 3.5      | 3.9                                              | 0.9  | 4.0   | 2.0  | 8.5  | 1.5 | 6.4  | 3.9 | 2.4  | 14.8 | 33.3  | 4.4  | 4.5   |  |
| 10F5                 | 2.5      | 2.3                                              | 0.9  | 3.3   | 2.0  | 7.3  | 2.4 | 7.5  | 2.6 | 2.8  | 15.2 | 25.1  | 8.1  | 5.4   |  |
| 11E10                | 1.2      | 1.5                                              | 1.0  | 1.1   | 1.5  | 2.7  | 1.0 | 2.3  | 2.4 | 1.0  | 1.2  | 2.5   | 1.0  | 1.0   |  |
| 12D4                 | 3.3      | 3.4                                              | 1.4  | 4.4   | 2.3  | 8.9  | 1.2 | 7.6  | 2.4 | 1.8  | 19.2 | 26.0  | 1.7  | 3.0   |  |
| 12F12                | 3.0      | 3.1                                              | 1.1  | 4.0   | 1.9  | 6.7  | 1.5 | 9.5  | 2.5 | 2.1  | 17.2 | 32.8  | 3.2  | 5.2   |  |

For the rapid antibody pairing study, an array immobilized with 14 of anti-HRP2 monoclonal antibodies on the bottom of each well of 96-well plate was screened pairwise against 10, 100, and 1,000 pg/ml of recombinant HRP2 protein. The performance of each capture-detection pair was screened by measuring signal-to-noise ratio. Signal-to-noise ratio of 10 pg/ml to blank sample is shown. The heat map was created using the Quick Analysis tool from Excel. The red in color represents the stronger binding response whereas the blue for the poor binding response.

**Table S3.** Rapid antibody pairing to identify the high performing antibody pair in detecting Pan LDH and *P. vivax* LDH

|         |           | Signal-to-noise ratio of 1000 pg/ml to blank; <i>P. falciparum</i> LDH |      |      |      |      |     |      |      |
|---------|-----------|------------------------------------------------------------------------|------|------|------|------|-----|------|------|
| Capture | Detection | 1201                                                                   | 19G7 | 1246 | 12G1 | 6G9  | 3H8 | 1102 | 13H1 |
|         | 1201      |                                                                        | 57.4 | 27.6 | 62.8 | 16.0 | 9.6 | 0.9  | 1.0  |
| 19G7    |           | 133.3                                                                  | 2.4  | 39.9 | 4.0  | 16.8 | 1.0 | 1.1  | 1.0  |
| 1246    |           | 38.1                                                                   | 12.6 | 47.5 | 1.5  | 8.4  | 0.9 | 1.0  | 1.0  |
| 12G1    |           | 103.6                                                                  | 4.2  | 59.1 | 1.7  | 23.5 | 1.0 | 0.8  | 0.9  |
| 6G9     |           | 16.7                                                                   | 6.3  | 19.9 | 3.7  | 3.1  | 1.0 | 0.9  | 1.0  |
| 3H8     |           | 1.1                                                                    | 0.9  | 1.5  | 1.0  | 1.1  | 1.2 | 1.0  | 1.1  |
| 1102    |           | 1.4                                                                    | 0.9  | 0.9  | 0.9  | 0.8  | 0.9 | 1.2  | 1.0  |
| 13H1    |           | 1.0                                                                    | 1.2  | 1.3  | 0.9  | 0.8  | 1.1 | 0.8  | 1.2  |

  

|         |           | Signal-to-noise ratio of 1000 pg/ml to blank; <i>P. vivax</i> LDH |      |      |      |      |      |      |      |
|---------|-----------|-------------------------------------------------------------------|------|------|------|------|------|------|------|
| Capture | Detection | 1201                                                              | 19G7 | 1246 | 12G1 | 6G9  | 3H8  | 1102 | 13H1 |
|         | 1201      |                                                                   | 46.0 | 34.0 | 10.1 | 24.1 | 1.4  | 39.9 | 56.2 |
| 19G7    |           | 113.1                                                             | 4.0  | 8.8  | 12.6 | 1.7  | 37.7 | 21.7 | 14.1 |
| 1246    |           | 42.1                                                              | 14.7 | 6.0  | 2.2  | 1.3  | 17.1 | 6.2  | 3.8  |
| 12G1    |           | 169.3                                                             | 5.5  | 13.5 | 2.0  | 1.6  | 30.5 | 1.0  | 2.0  |
| 6G9     |           | 9.8                                                               | 4.7  | 2.2  | 4.2  | 1.1  | 6.3  | 1.0  | 1.9  |
| 3H8     |           | 41.6                                                              | 4.7  | 3.3  | 2.1  | 1.0  | 2.1  | 1.0  | 1.0  |
| 1102    |           | 52.7                                                              | 5.5  | 4.0  | 1.2  | 0.9  | 1.1  | 4.2  | 1.3  |
| 13H1    |           | 37.5                                                              | 13.0 | 2.2  | 6.9  | 1.0  | 1.8  | 1.3  | 2.0  |

For the rapid antibody pairing study, an array immobilized with 8 of anti-pan LDH and anti-*P. vivax* LDH monoclonal antibodies on the bottom of each well of 96-well plate was screened pairwise against 100, 1,000, and 10,000 pg/ml of either *P. falciparum* LDH or *P. vivax* LDH proteins. The performance of each capture-detection pair was screened by measuring signal-to-noise ratio. Signal-to-noise ratio of 1,000 pg/ml to blank sample is shown. The heat map was created using the Quick Analysis tool from Excel. The red in color represents the stronger binding response whereas the blue for the poor binding response.

**Table S4.** Final monoclonal antibodies and calibrator proteins with their sources used on the 4-Plex array

| Biomarker           | Capture antibody | Detection antibody | Calibrator                | Assay                                  |
|---------------------|------------------|--------------------|---------------------------|----------------------------------------|
| HRP2                | 0445 (Vista)     | 11E10 (Precision)  | HRP2 (Microcoat)          | Quantitative                           |
| Pan LDH             | 12G1 (Vista)     | 1201 (Vista)       | <i>P. vivax</i> LDH (CTK) | Qualitative <sup>b</sup> /Quantitative |
| <i>P. vivax</i> LDH | 1102 (Vista)     | 1201 (Vista)       | <i>P. vivax</i> LDH (CTK) | Quantitative                           |
| Human CRP           | C6 (HyTest)      | n.a <sup>a</sup>   | CRP (HyTest)              | Quantitative                           |

<sup>a</sup> Quantification of human CRP is based on competitive ELISA using biotinylated CRP. Supplier is shown in parenthesis.

<sup>b</sup> Pan LDH assay may be used for quantification of pLDH in a specimen infected with *P. falciparum* species.

**Table S5.** Characterization of calibrator curves generated during assay validation

| HRP2<br>(pg/mL) | Pixel intensity |      | Back-calculated |      | Accuracy % <sup>a</sup> | Pan LDH<br>(pg/mL) | Pixel intensity |           | Back-calculated |      | Accuracy % <sup>a</sup> |
|-----------------|-----------------|------|-----------------|------|-------------------------|--------------------|-----------------|-----------|-----------------|------|-------------------------|
|                 | Mean, CV%       |      | Mean, CV%       |      |                         | Mean, CV%          |                 | Mean, CV% |                 |      |                         |
| 590             | 47833.3         | 1.7  | 588.0           | 28.5 | 99.7                    | 10,514             | 33431.5         | 5.7       | 10596.0         | 11.2 | 100.8                   |
| 196.7           | 41176.1         | 2.5  | 190.8           | 8.0  | 97.0                    | 3,504.7            | 15460.0         | 9.3       | 3480.3          | 10.5 | 99.3                    |
| 65.6            | 22433.3         | 6.9  | 66.8            | 8.2  | 101.8                   | 1,168.2            | 5571.2          | 8.2       | 1155.5          | 9.0  | 98.9                    |
| 21.9            | 7747.8          | 8.5  | 21.6            | 8.5  | 98.8                    | 389.4              | 2023.5          | 7.9       | 390.8           | 9.1  | 100.4                   |
| 7.3             | 2692.3          | 9.7  | 7.5             | 9.9  | 102.3                   | 129.8              | 798.9           | 8.8       | 128.7           | 11.3 | 99.1                    |
| 2.4             | 907.7           | 16.9 | 2.3             | 20.2 | 93.7                    | 43.3               | 388.8           | 7.8       | 42.2            | 16.0 | 97.5                    |
| 0.8             | 450.2           | 14.9 | 0.9             | 23.8 | 109.0                   | 14.4               | 259.5           | 6.9       | 14.4            | 26.8 | 100.1                   |
| 0.3             | 252.7           | 25.0 | 0.3             | 72.4 | 101.4                   | 4.8                | 213.2           | 13.9      | 7.3             | 65.8 | 151.7                   |

  

| <i>P. vivax</i> LDH<br>(pg/mL) | Pixel intensity |      | Back-calculated |      | Accuracy % <sup>a</sup> | CRP<br>(ng/mL) | Pixel intensity |           | Back-calculated |      | Accuracy % <sup>a</sup> |
|--------------------------------|-----------------|------|-----------------|------|-------------------------|----------------|-----------------|-----------|-----------------|------|-------------------------|
|                                | Mean, CV%       |      | Mean, CV%       |      |                         | Mean, CV%      |                 | Mean, CV% |                 |      |                         |
| 497.0                          | 10365.1         | 8.2  | 479.6           | 9.9  | 96.5                    | 13,500         | 496.7           | 9.4       | 13713.3         | 11.2 | 101.6                   |
| 165.7                          | 3990.5          | 9.1  | 165.5           | 10.0 | 99.9                    | 4,500          | 1278.0          | 12.3      | 4479.7          | 16.8 | 99.5                    |
| 55.2                           | 1457.0          | 8.1  | 54.7            | 9.9  | 99.0                    | 1,500          | 3109.5          | 11.0      | 1543.4          | 13.8 | 102.9                   |
| 18.4                           | 637.1           | 6.2  | 18.7            | 9.7  | 101.4                   | 500            | 7732.9          | 10.2      | 505.4           | 13.1 | 101.1                   |
| 6.1                            | 347.8           | 8.0  | 6.1             | 20.6 | 99.1                    | 166.7          | 16965.8         | 10.2      | 159.8           | 18.8 | 95.9                    |
| 2.1                            | 251.0           | 10.2 | 2.4             | 29.6 | 115.1                   | 55.6           | 24216.3         | 6.2       | 61.5            | 28.7 | 110.6                   |
| 0.7                            | 223.0           | 14.2 | 1.3             | 81.3 | 193.5                   | 18.5           | 27828.5         | 9.0       | 37.3            | 73.6 | 201.2                   |
| 0.2                            | 209.7           | 15.8 | 1.9             | 26.9 | 819.4                   | 6.2            | 28755.7         | 9.2       | 35.9            | 57.6 | 581.8                   |

<sup>a</sup> Accuracy was calculated using the formula; (observed concentration/expected concentration) x 100. Data were analyzed from twelve calibration curves obtained on different days.

**Table S6.** Dilutional linearity with the 4-Plex array

|          |       | HRP2                   |                             |            | Pan LDH                |                             |            |
|----------|-------|------------------------|-----------------------------|------------|------------------------|-----------------------------|------------|
|          |       | Expected conc. (pg/mL) | Mean adjusted conc. (pg/mL) | Accuracy % | Expected conc. (pg/mL) | Mean adjusted conc. (pg/mL) | Accuracy % |
| Sample 1 | 1:4   | 45.0                   | 38.2                        | 84.9       | 55.0                   | 53.2                        | 96.8       |
|          | 1:8   | 22.5                   | 22.1                        | 98.2       | 27.5                   | 27.8                        | 101.1      |
|          | 1:16  | 11.3                   | 11.2                        | 99.2       | 13.8                   | <LLOQ                       |            |
|          | 1:32  | 5.6                    | 5.8                         | 102.6      | 6.9                    | <LLOQ                       |            |
|          | 1:64  | 2.8                    | 3.0                         | 106.5      | 3.4                    | <LLOQ                       |            |
|          | 1:128 | 1.4                    | 1.6                         | 112.0      | 1.7                    | <LLOQ                       |            |
| Sample 2 | 1:4   | 325.0                  | 332.3                       | 102.2      | 300.0                  | 267.0                       | 89.0       |
|          | 1:8   | 162.5                  | 167.2                       | 102.9      | 150.0                  | 140.1                       | 93.4       |
|          | 1:16  | 81.3                   | 80.1                        | 98.5       | 75.0                   | 72.1                        | 96.2       |
|          | 1:32  | 40.6                   | 39.5                        | 97.1       | 37.5                   | 37.9                        | 101.1      |
|          | 1:64  | 20.3                   | 19.5                        | 95.9       | 18.8                   | 18.9                        | 100.7      |
|          | 1:128 | 10.2                   | 10.1                        | 99.5       | 9.4                    | <LLOQ                       |            |
| Sample 3 | 1:4   | 275.0                  | 318.7                       | 115.9      | 200.0                  | 174.4                       | 87.2       |
|          | 1:8   | 137.5                  | 135.5                       | 98.5       | 100.0                  | 95.9                        | 95.9       |
|          | 1:16  | 68.8                   | 65.9                        | 95.9       | 50.0                   | 51.8                        | 103.6      |
|          | 1:32  | 34.4                   | 32.1                        | 93.3       | 25.0                   | 25.0                        | 99.8       |
|          | 1:64  | 17.2                   | 16.3                        | 94.8       | 12.5                   | <LLOQ                       |            |
|          | 1:128 | 8.6                    | 8.6                         | 100.2      | 6.3                    | <LLOQ                       |            |
| Sample 4 | 1:4   | ND                     | <LLOQ                       |            | 875.0                  | 831.5                       | 95.0       |
|          | 1:8   | ND                     | <LLOQ                       |            | 437.5                  | 446.0                       | 101.9      |
|          | 1:16  | ND                     | <LLOQ                       |            | 218.8                  | 215.5                       | 98.5       |
|          | 1:32  | ND                     | <LLOQ                       |            | 109.4                  | 110.0                       | 100.6      |
|          | 1:64  | ND                     | <LLOQ                       |            | 54.7                   | 55.6                        | 101.6      |
|          | 1:128 | ND                     | <LLOQ                       |            | 27.3                   | 29.5                        | 107.8      |
| Sample 5 | 1:4   | ND                     | <LLOQ                       |            | 1040.7                 | 1050.0                      | 99.1       |
|          | 1:8   | ND                     | <LLOQ                       |            | 532.0                  | 525.0                       | 101.3      |
|          | 1:16  | ND                     | <LLOQ                       |            | 253.3                  | 262.5                       | 96.5       |
|          | 1:32  | ND                     | <LLOQ                       |            | 129.1                  | 131.3                       | 98.4       |
|          | 1:64  | ND                     | <LLOQ                       |            | 62.2                   | 65.6                        | 94.8       |
|          | 1:128 | ND                     | <LLOQ                       |            | 38.0                   | 32.8                        | 115.9      |

|          |       | <i>P. vivax</i> LDH    |                             |            | CRP                    |                             |            |
|----------|-------|------------------------|-----------------------------|------------|------------------------|-----------------------------|------------|
|          |       | Expected conc. (pg/mL) | Mean adjusted conc. (pg/mL) | Accuracy % | Expected conc. (pg/mL) | Mean adjusted conc. (pg/mL) | Accuracy % |
| Sample 1 | 1:4   | ND                     | <LLOQ                       |            | ND                     | <LLOQ                       |            |
|          | 1:8   | ND                     | <LLOQ                       |            | ND                     | <LLOQ                       |            |
|          | 1:16  | ND                     | <LLOQ                       |            | ND                     | <LLOQ                       |            |
|          | 1:32  | ND                     | <LLOQ                       |            | ND                     | <LLOQ                       |            |
|          | 1:64  | ND                     | <LLOQ                       |            | ND                     | <LLOQ                       |            |
|          | 1:128 | ND                     | <LLOQ                       |            | ND                     | <LLOQ                       |            |
| Sample 2 | 1:4   | ND                     | <LLOQ                       |            | 70.0                   | 69.5                        | 99.2       |
|          | 1:8   | ND                     | <LLOQ                       |            | 35.0                   | <LLOQ                       |            |
|          | 1:16  | ND                     | <LLOQ                       |            | 17.5                   | <LLOQ                       |            |
|          | 1:32  | ND                     | <LLOQ                       |            | 8.8                    | <LLOQ                       |            |
|          | 1:64  | ND                     | <LLOQ                       |            | 4.4                    | <LLOQ                       |            |
|          | 1:128 | ND                     | <LLOQ                       |            | 2.2                    | <LLOQ                       |            |
| Sample 3 | 1:4   | ND                     | <LLOQ                       |            | 450.0                  | 495.3                       | 110.1      |
|          | 1:8   | ND                     | <LLOQ                       |            | 225.0                  | 200.7                       | 89.2       |
|          | 1:16  | ND                     | <LLOQ                       |            | 112.5                  | <LLOQ                       |            |
|          | 1:32  | ND                     | <LLOQ                       |            | 56.3                   | <LLOQ                       |            |
|          | 1:64  | ND                     | <LLOQ                       |            | 28.1                   | <LLOQ                       |            |
|          | 1:128 | ND                     | <LLOQ                       |            | 14.1                   | <LLOQ                       |            |
| Sample 4 | 1:4   | 223.3                  | 230.6                       | 103.3      | 100.0                  | 103.6                       | 103.6      |
|          | 1:8   | 111.6                  | 120.1                       | 107.6      | 50.0                   | <LLOQ                       |            |
|          | 1:16  | 55.8                   | 54.4                        | 97.5       | 25.0                   | <LLOQ                       |            |
|          | 1:32  | 27.9                   | 28.1                        | 100.6      | 12.5                   | <LLOQ                       |            |
|          | 1:64  | 13.9                   | 13.2                        | 94.8       | 6.3                    | <LLOQ                       |            |
|          | 1:128 | 7.0                    | 7.1                         | 102.5      | 3.1                    | <LLOQ                       |            |
| Sample 5 | 1:4   | 266.0                  | 296.4                       | 111.4      | ND                     | <LLOQ                       |            |
|          | 1:8   | 133.0                  | 145.2                       | 109.2      | ND                     | <LLOQ                       |            |
|          | 1:16  | 66.5                   | 65.2                        | 98.0       | ND                     | <LLOQ                       |            |
|          | 1:32  | 33.3                   | 31.4                        | 94.4       | ND                     | <LLOQ                       |            |
|          | 1:64  | 16.6                   | 14.8                        | 89.0       | ND                     | <LLOQ                       |            |
|          | 1:128 | 8.3                    | 8.1                         | 97.9       | ND                     | <LLOQ                       |            |

<sup>a</sup> Accuracy was calculated using the analyte concentration determined at dilution 1:4 as a reference value.

ND: not detected



**Table S7.** Descriptive statistics for amount of circulating antigen per parasite

| Biomarker           | No. of specimen <sup>a</sup> | Mean  | Min   | 25 percentile | Median | 75 percentile | Max   |
|---------------------|------------------------------|-------|-------|---------------|--------|---------------|-------|
| HRP2                | 39                           | 7.295 | 0.001 | 0.008         | 0.049  | 0.386         | 108   |
| Pan LDH             | 30                           | 0.066 | 0.013 | 0.030         | 0.035  | 0.074         | 0.269 |
| <i>P. vivax</i> LDH | 41                           | 0.006 | 0.001 | 0.002         | 0.003  | 0.008         | 0.038 |

<sup>a</sup> Analysis was performed with specimens with parasitemia in the range of 1 to 100 parasites/ $\mu$ L and analyte concentration greater than the assay cutoff.

a

**A**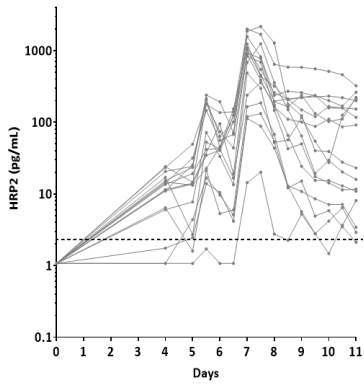**B**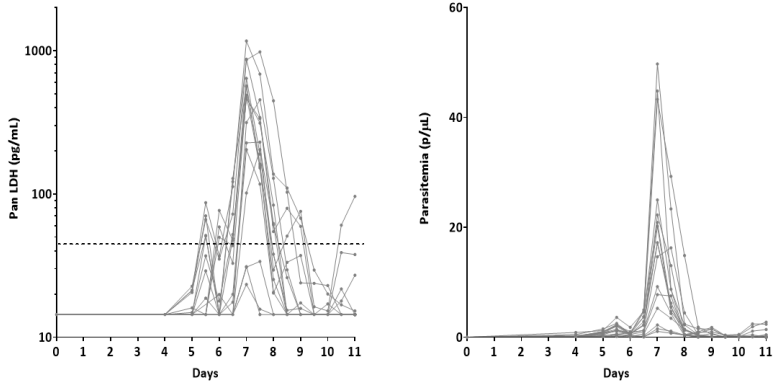

**Fig S1.** Concentration of HRP2 and Pan LDH, and parasitemia in blood specimens from all subjects obtained during a course of IBSM study. (A) concentration of HRP2 and Pan LDH, and (B) Parasitemia. The dotted lines indicate cut-off values.

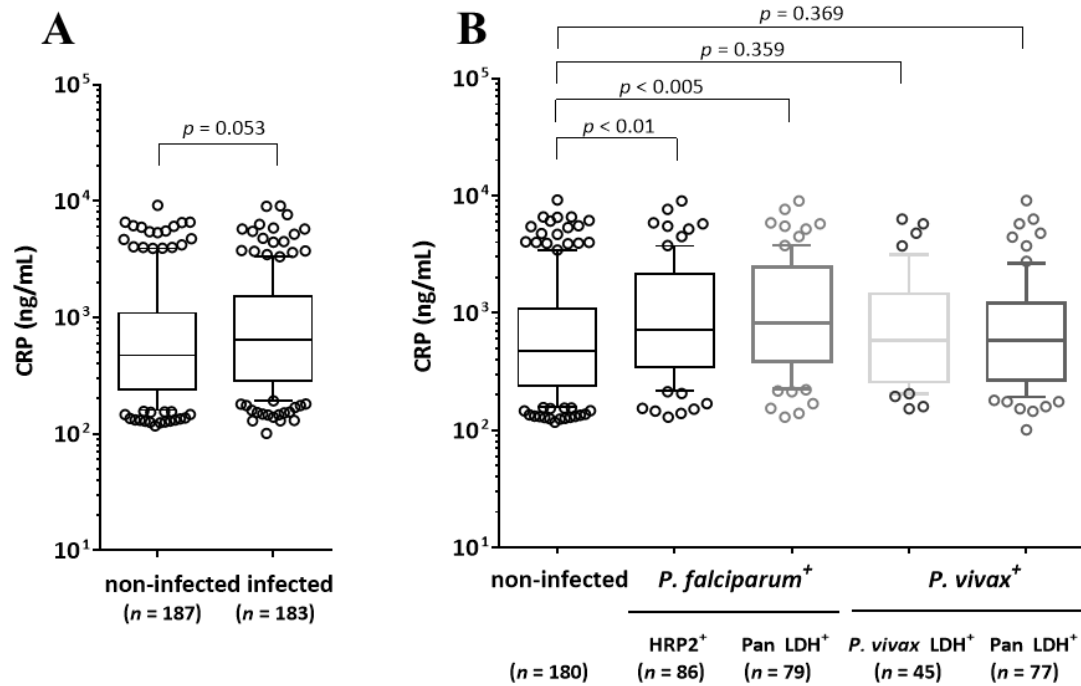

**Fig S2. Distribution of CRP levels in malaria non-infected and infected groups.** Box plots of CRP levels in infection positive and negative groups determined by A) qPCR and B) 4-Plex array. Uninfected group determined by 4-Plex array was defined by the absence of any of malaria antigens. CRP levels were analyzed only from specimens which had quantifiable amount of HRP2, and *P. vivax* LDH greater than the assay cutoff. The results show the median (horizontal line), the 25th and 75th percentiles (boxes), the 10th and 90th percentiles (error bars) and the outliers (open circles). The two-tailed Mann–Whitney U-test was used to compare the distributions of two unmatched groups.
